# Supplementary material
Source: Springer Nature journal article supplement (https://www.springermedizin.de/resource/supplementary/12874_2010_644_MOESM3_ESM.pdf/9432286)

**X correlation**

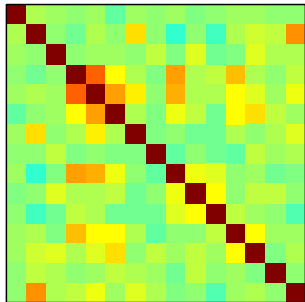

**Y correlation**

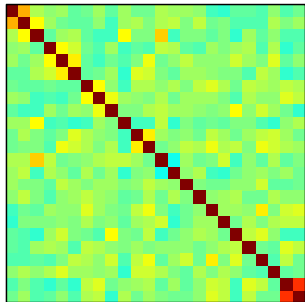

**Cross-correlation**

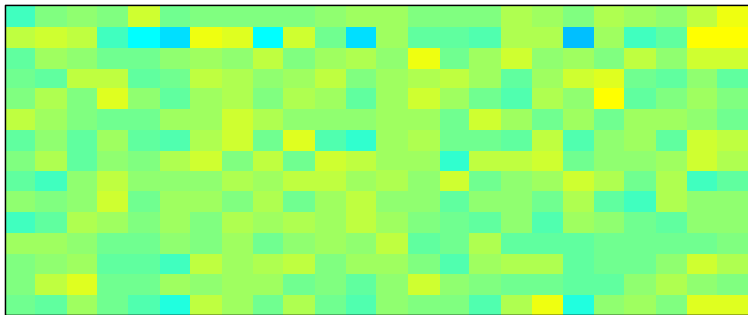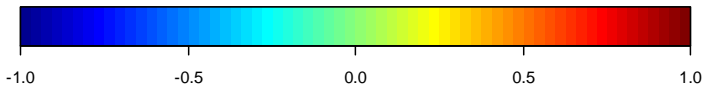

Supplement: MOESM3 [file 9432286]
